# Supplementary material for: Ifi27l2a acts as a cytokine that promotes a pro-inflammatory phenotype in microglia and enhances neuroinflammation
Source: Research Square preprint supplement (doi:10.21203/rs.3.rs-7383703/v1), 2025-09-24
Supplement: Supplementary file 1 [file 25c869c46e5699ae0e37956b.docx]

Supplemental Table 1. Primers Used in This Study

| Gene | Forward (5’→3’) | Reverse (5’→3’) |
| --- | --- | --- |
| *Gapdh* | GATGGCAACAATCTCCACTTTGC | GCCGCATCTTCTTGTGCAGT |
| *Ifi27l2a* | CTGTTTGGCTCTGCCATAGGAG | CCTAGGATGGCATTTGTTGATGTGG |
| *Il-1α* | TGCAGTCCATAACCCATGATC | ACAAACTTCTGCCTGACGAG |
| *Il-1β* | CTGTGTCTTTCCCGTGGACC | CAGCTCATATGGGTCCGACA |
| *Tnfα* | GTGGAACTGGCAGAAGAGGC | AGACAGAAGAGCGTGGTGGC |
| *Mmp2* | GCTCTGTCCTCCTCTGTAGTTA | GGTACAGTCAGCACCTTTCTT |
| *Mmp3* | GGATCTTCGCAGTTGGAATTTC | GATGCCTTCCTTGGATCTCTT |
| *Mmp9* | TGCACTGGGCTTAGATCATTC | TGCCGTCTATGTCGTCTTTATTC |
| *Acod1* | GTATCATTCGGAGGAGCAAGAG | GGAGGTGTTGGAACTGTAGATT |
| *Icam1* | AGTAGATCAGTGAGGAGGTGAA | GCATCCTGACCAGTAGAGAAAC |
| *Vcam1* | CCACGTGGACATCTACTCTTTC | CCAGCCTGTAAACTGGGTAAA |
| *Tf* | CTCCTGGCCACCATCTTTATC | GGCTTCAGCCTTTCCTCTATG |
| *Mcp1* | AGTAGGCTGGAGAGCTACAA | GTATGTCTGGACCCATTCCTTC |

**SUPPLEMENTARY FIGURE LEGENDS**

**Supplementary Fig. 1. Ifi27l2a does not affect cell viability and increases microglial activation** Primary microglia were treated with rIfi27l2a was added to cells for 24 hours. **(a)** Cell viability was measured by MTT assay after rIfi27l2a treatment in primary microglia. (n=4, NS, non-significance). **(b)** RNA amount was measured after rIfi27l2a treatment (n=6, ** p<0.01 compared to 0 ng/ml, Student t-test).

**Supplementary Fig. 2. GSEA analysis highlights the key enriched molecular function gene set in rIfi27l2a-treated MG.** GSEA analysis using DESeq2 normalized count matrix revealed that the gene sets related to **(a)** 'chemokine receptor binding’, **(b)** 'cytokine activity', **(c)** 'cytokine receptor binding', **(d)** 'antigen binding', (**e**) 'chemokine activity' and **(f)** 'hormone binding' in GO: molecular function were enriched in rIfi27l2a-treated MG.

**Supplementary Fig. 3. The effect of 2-DG on *Mmp2* and *Mmp9* expression levels in rIfi27l2a-treated cells.** The glycolysis inhibitor, 2-DG did not alter the expression of **(a)** *Mmp2* and **(b)** *Mmp9* in rIfi27l2a-treated Sim9A cells (n = 7-8, NS: not statistically significant, * p < 0.05, *** p < 0.001, One-way ANOVA with Sídák's multiple comparisons test).

**Supplementary Fig. 4. Proinflammatory effect of exogenous Ifi27l2a on endothelial cells.** **(a)** bEnd3 cells were treated with rIfi27l2a at 10 ng/ml and 100 ng/ml for 24 hours, stress fiber formation was visualized and analyzed after phalloidin staining. **(b)** Quantification of stress fiber (n=6, * p<0.05, two-tailed unpaired t-test. **(c)** bEnd3 cells were treated with rIfi27l2a at 10 ng/ml and 100 ng/ml for 24 hours and gene expression of *Il1a and* *Il1b* was measured by qRT-PCR. **(d)** Expression level of *Icam1*, *TF*, and *Mcp1* were measured (n=5-8. * p<0.05, one-way ANOVA with Tukey's multiple comparisons).

**Supplementary Fig. 5. The effect of Ifi27l2a on *Mmp2, Mmp3, and Mmp9* expression levels in bEnd3 cells.** bEnd3 cells were treated with rIfi27l2a at 10 ng/ml and 100 ng/ml for 24 hour and *Mmp2*, *Mmp3* and *Mmp9* expression were measured (n =5-8, * p < 0.05, One-way ANOVA with Šídák's multiple comparisons test).

**Supplementary Fig. 6. The effect of exogenous Ifi27l2a on neurovascular units.** Rat primary neurons were treated with 5 ng/ml LPS to induce cell death. rIfi27l2a was co-treated with LPS to the neurons for 24 hours. LDH assay was performed to measure cell death. Data was expressed as % of full kill control (n=5-6, * p<0.05, ** p<0.01 One-way ANOVA with Tukey's multiple comparisons).

**Supplementary Fig. 1**


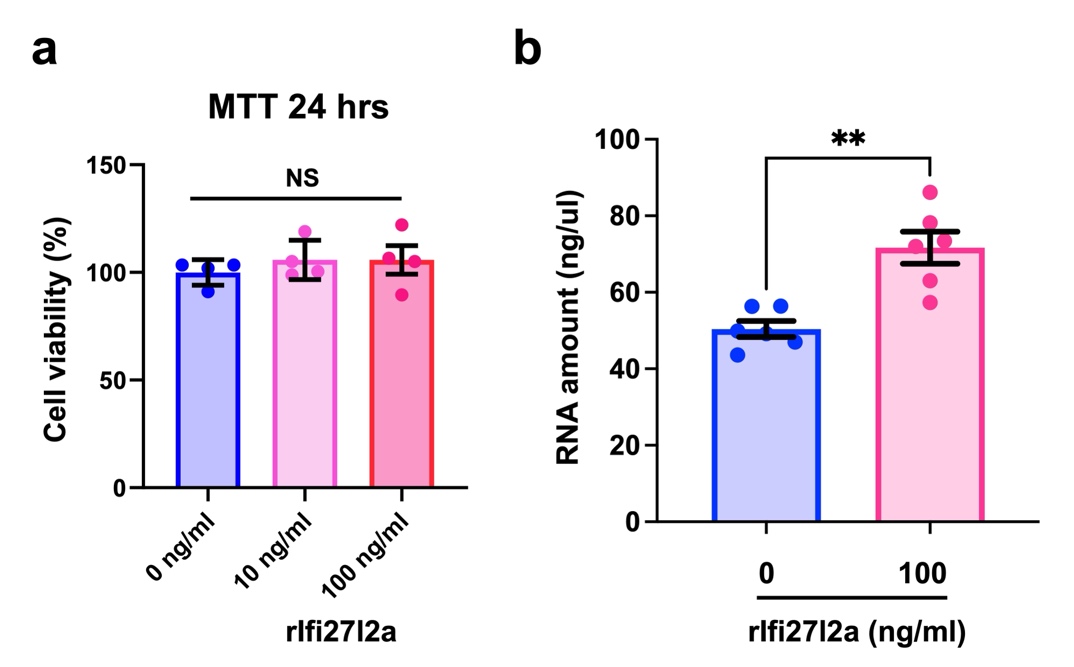


**Supplementary Fig. 2**


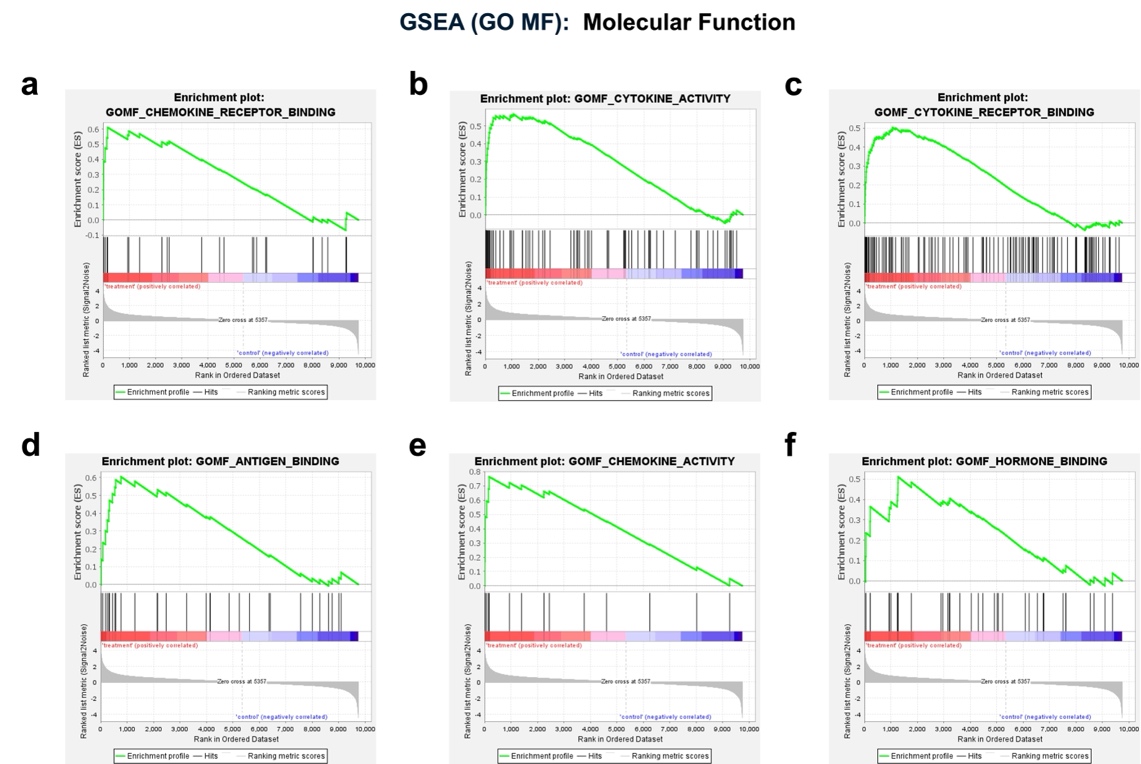


**Supplementary Fig. 3**


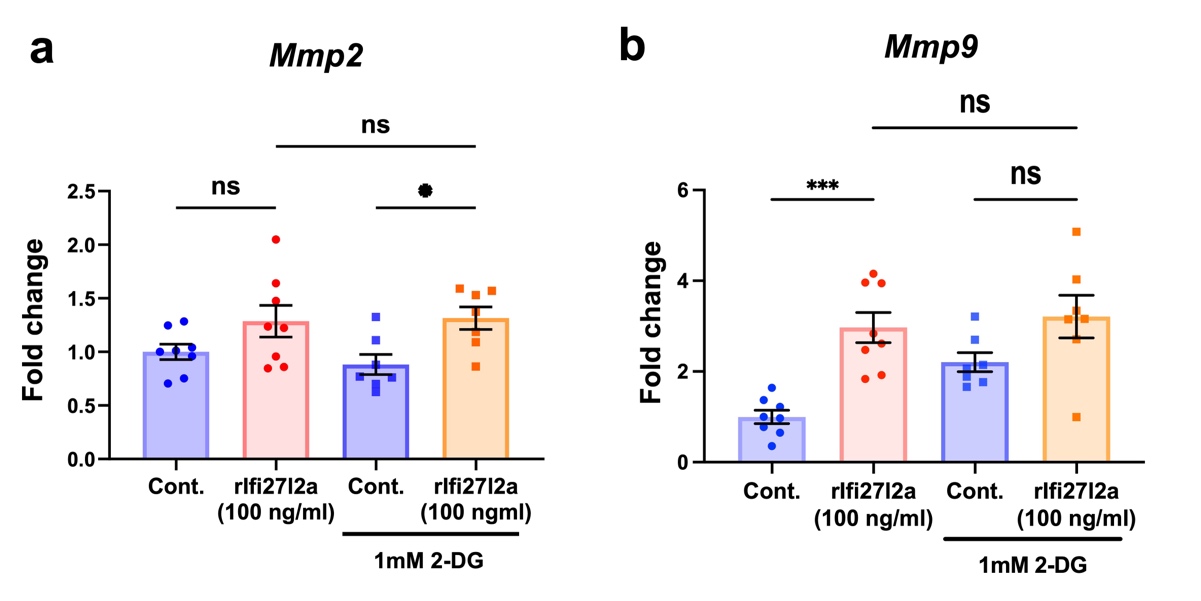


**Supplementary Fig. 4**

**
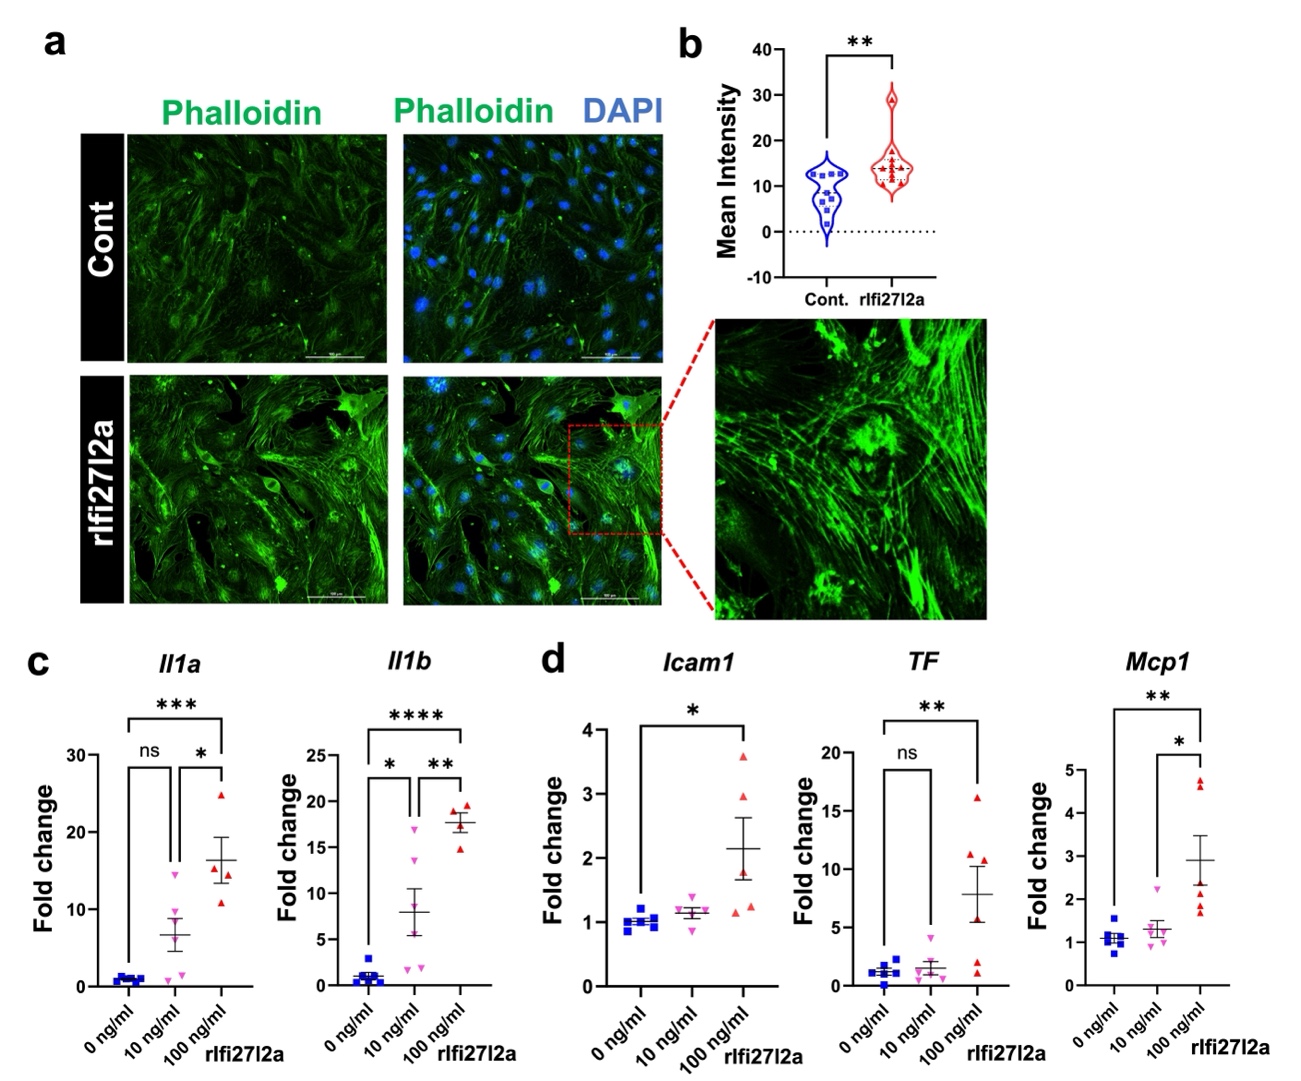
**

**Supplementary Fig. 5**

**
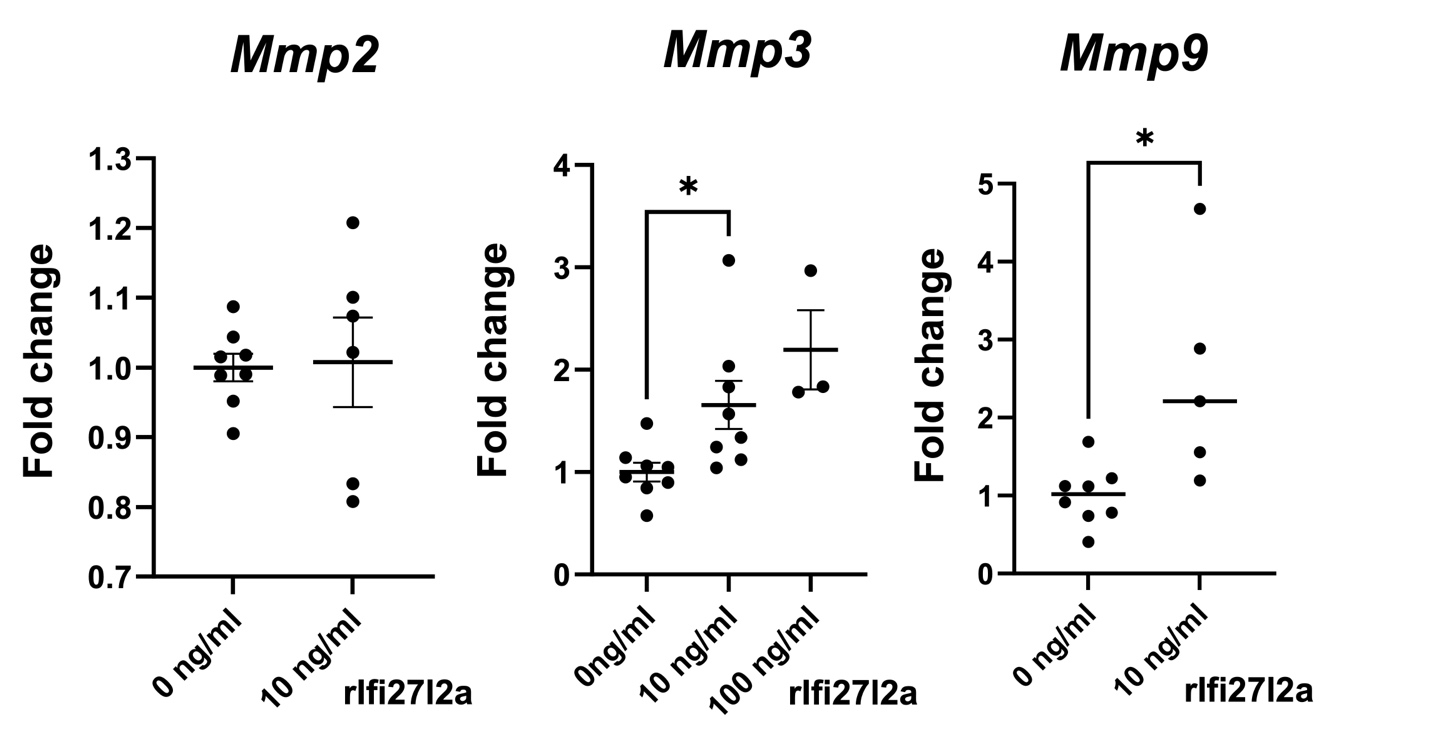
**

**Supplementary Fig. 6**

**
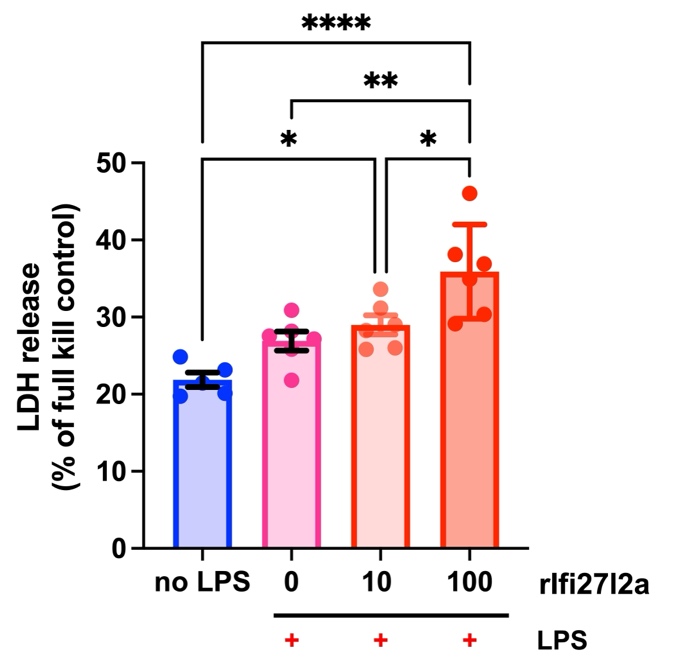
**
